# Supplementary material for: Temperature-induced fluorescence enhancement of GFP chromophore containing copolymers for detection of Bacillus thermophilus
Source: Royal Society of Chemistry journal article supplement (doi:10.1039/c3py01559a), 2013-12-16
Supplement: c3py01559a.pdf [file c3py01559a.pdf]

## *Supplementary Information*

# Temperature-induced fluorescence enhancement of GFP chromophore contained copolymers for detection of *Bacillus thermophiles*

Yanjie Zheng,<sup>‡a</sup> Guolin Li,<sup>‡b</sup> Hongping Deng,<sup>a</sup> Yue Su,<sup>\*a</sup> Jianhua Liu<sup>b</sup> and Xinyuan Zhu<sup>\*a</sup>

<sup>a</sup> School of Chemistry and Chemical Engineering, Shanghai Key Lab of Electrical Insulation and Thermal Aging, Shanghai Jiao Tong University, 800 Dongchuan Road, Shanghai 200240, People's Republic of China

<sup>b</sup> School of Life Science and Technology, Shanghai Jiao Tong University, 800 Dongchuan Road, Shanghai 200240, P. R. China

<sup>‡</sup> These authors are joint first authors.

\* To whom correspondence should be addressed. Tel.: +86-21-34203400;

Fax: +86-21-54741297; E-mail: yuesu@sjtu.edu.cn, xyzhu@sjtu.edu.cn

## S-1 Characterization of GFP chromophore, PEG-Cl, PEG-*b*-PNIPAM-Cl, PEG-*b*-PNIPAM-N<sub>3</sub> and PEG-*b*-PNIPAM-c

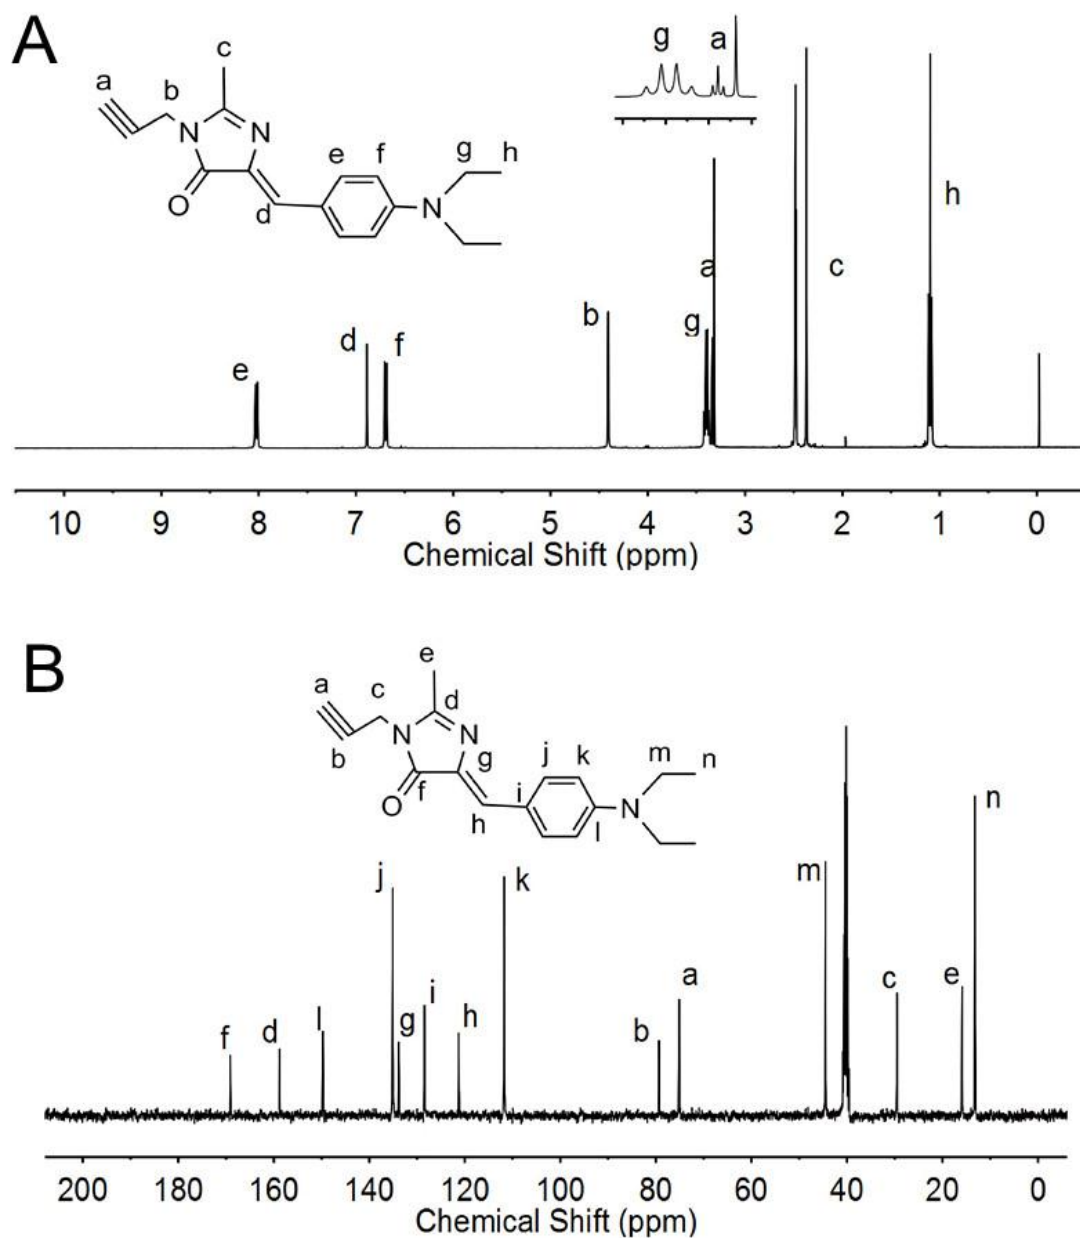

**Figure S1.** <sup>1</sup>H NMR (A) and <sup>13</sup>C NMR (B) spectra of the chromophore in DMSO-*d*<sub>6</sub>.

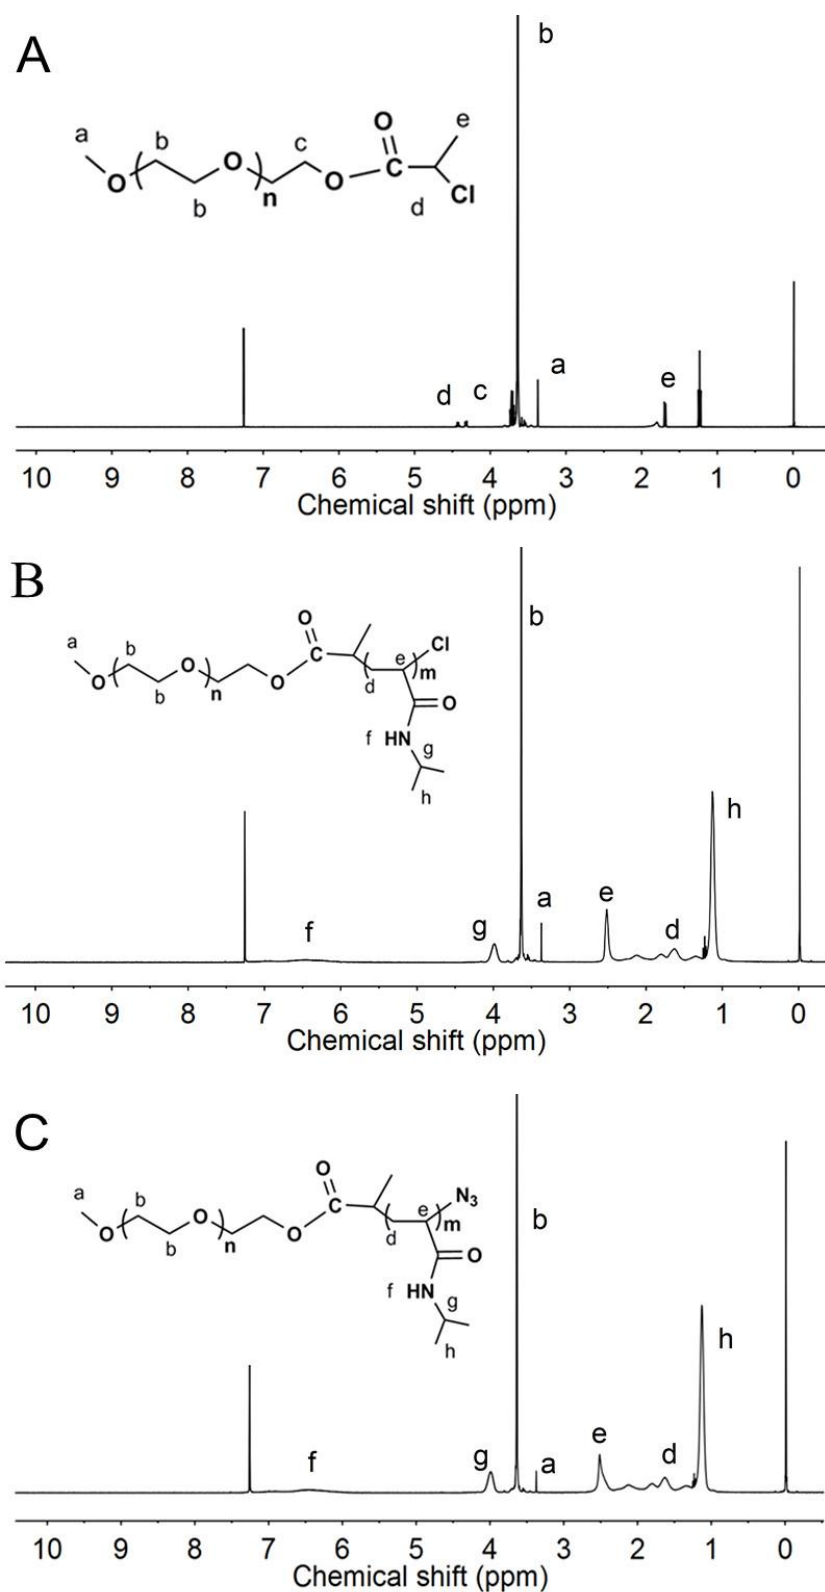

**Figure S2.**  $^1\text{H}$  NMR spectra of PEG-Cl (A), PEG-*b*-PNIPAM-Cl (B) and PEG-*b*-PNIPAM-N<sub>3</sub> (C) in  $\text{CDCl}_3$ .

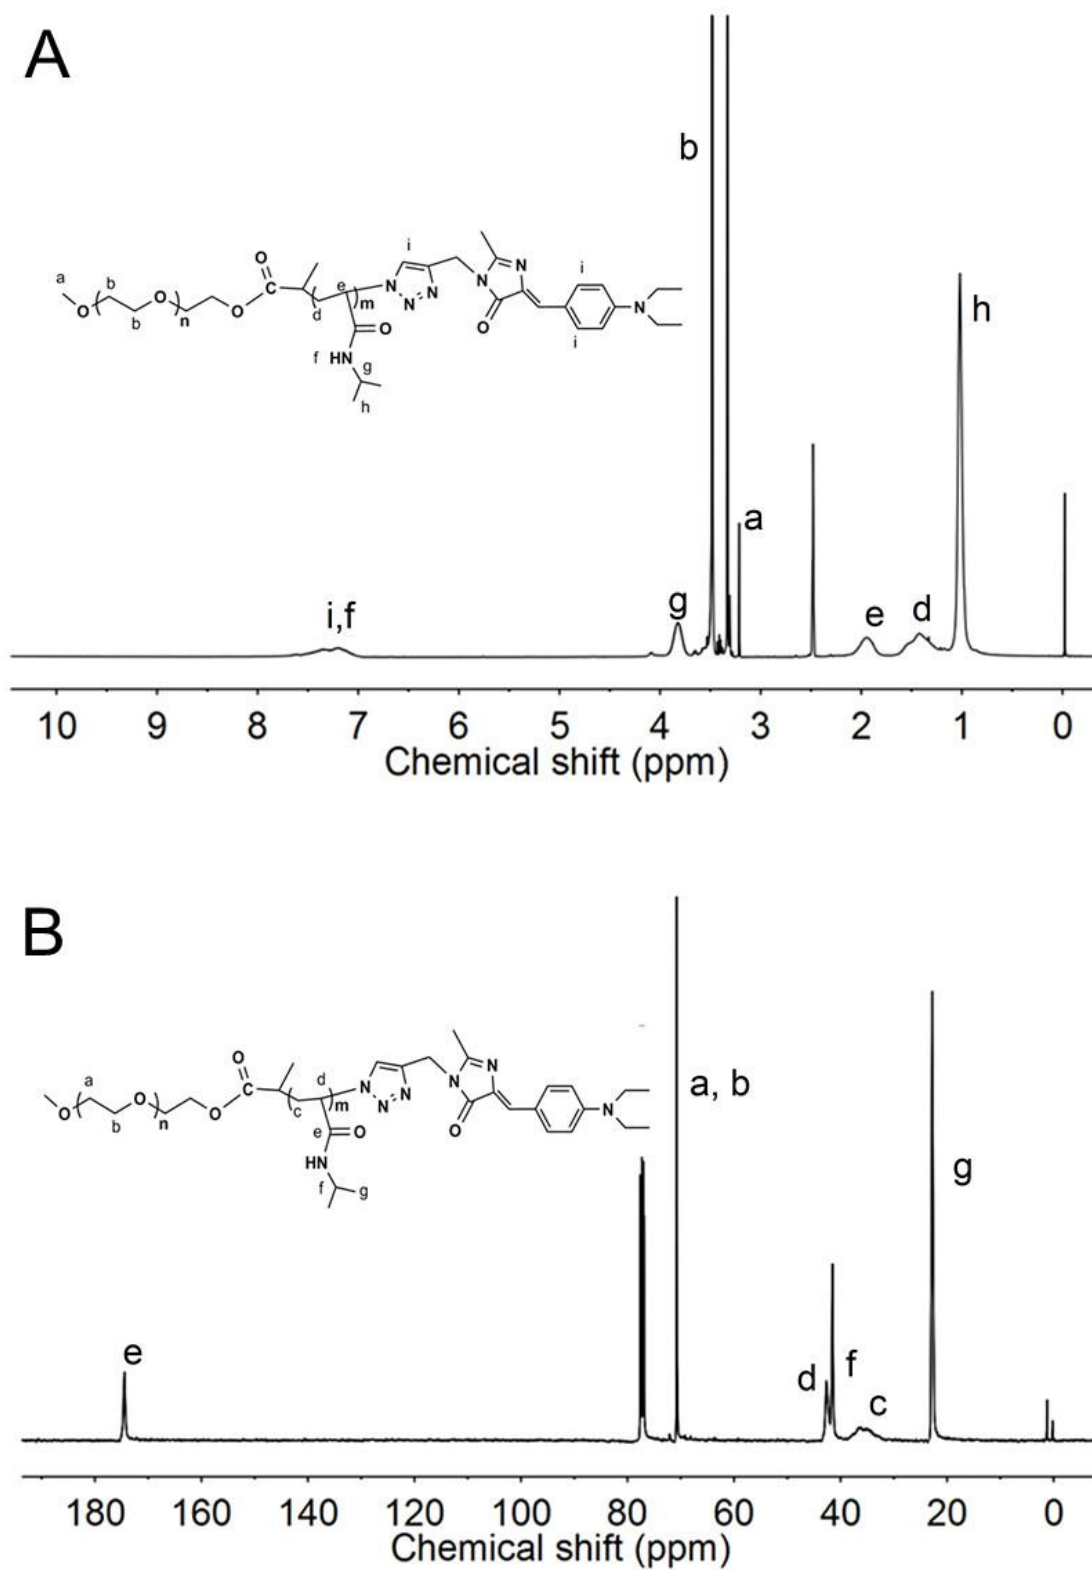

**Figure S3.**  $^1\text{H}$  NMR (A) and  $^{13}\text{C}$  NMR (B) spectra of PEG-*b*-PNIPAM-*c* in  $\text{DMSO-}d_6$  and  $\text{CDCl}_3$ , respectively.

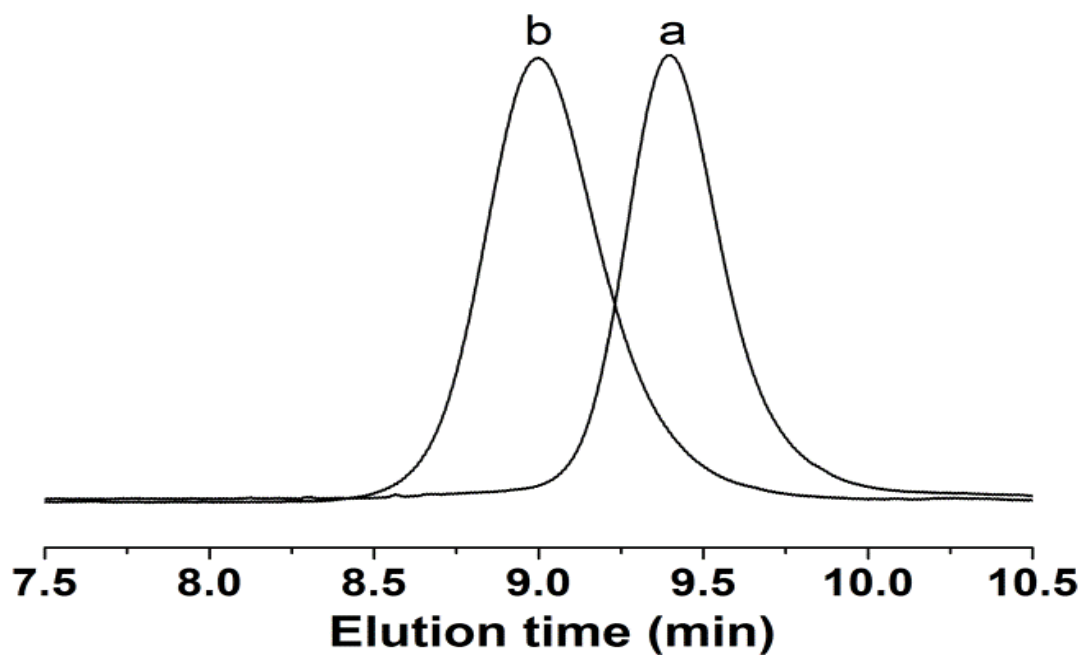

**Figure S4.** GPC curves of PEG-*b*-PNIPAM-Cl: (a) PEG<sub>43</sub>-*b*-PNIPAM<sub>39</sub>-Cl, (b) PEG<sub>43</sub>-*b*-PNIPAM<sub>136</sub>-Cl.

## S-2 Emission spectra of PEG-*b*-PNIPAM-*c*

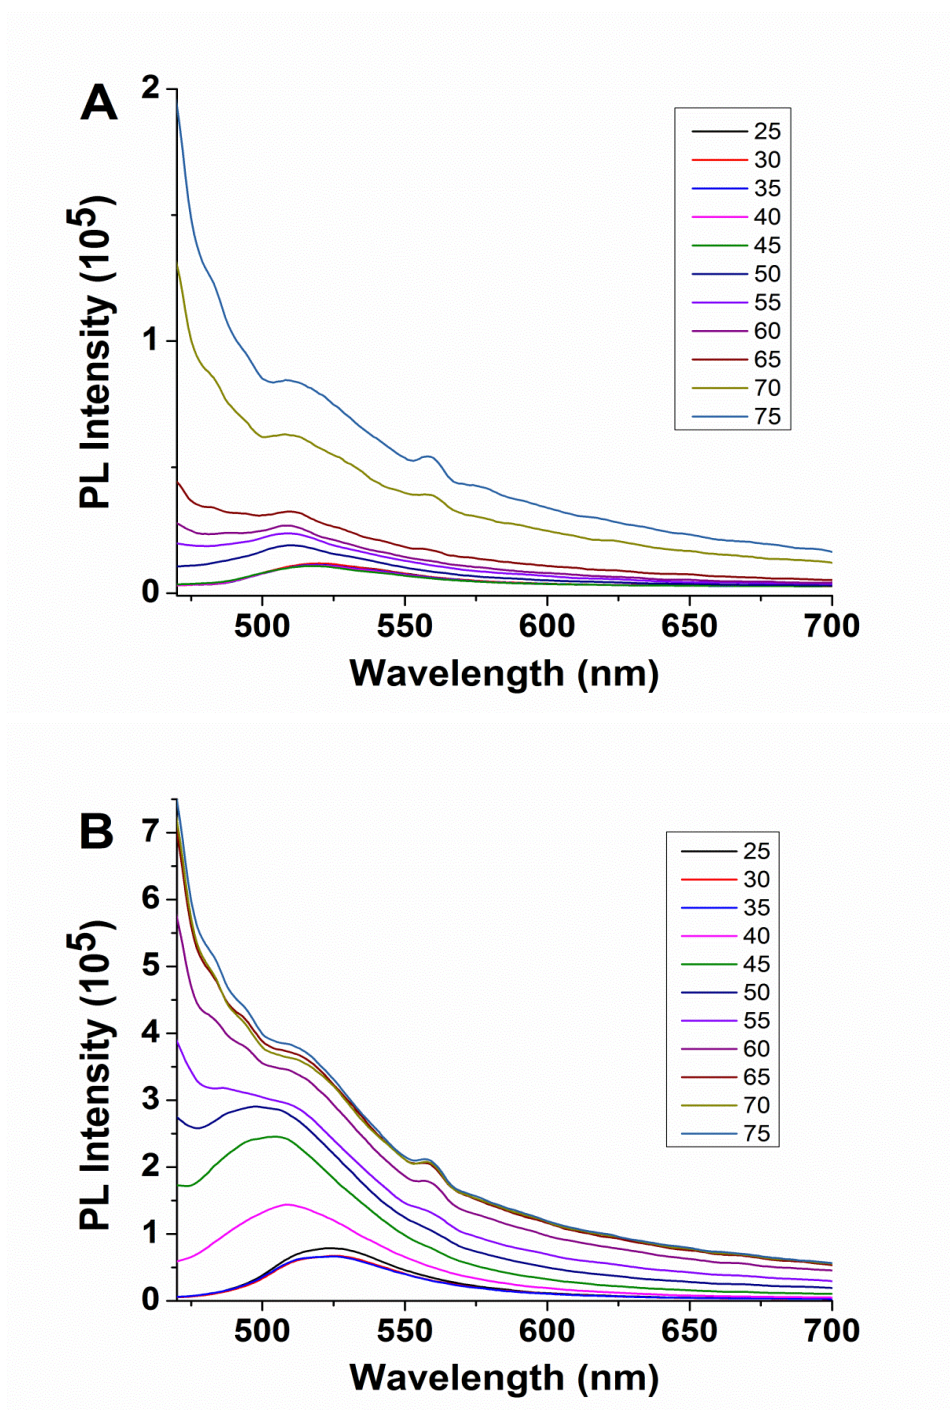

**Figure S5.** Emission spectra of PEG<sub>43</sub>-*b*-PNIPAM<sub>39</sub>-*c* (A) and PEG<sub>43</sub>-*b*-PNIPAM<sub>136</sub>-*c* (B) at 57 μM concentration in aqueous solution with variable temperatures at 25, 30, 35, 40, 45, 50, 55, 60, 65, 70 and 75 °C.

### S-3 Control of *Bacillus thermophiles* after heating

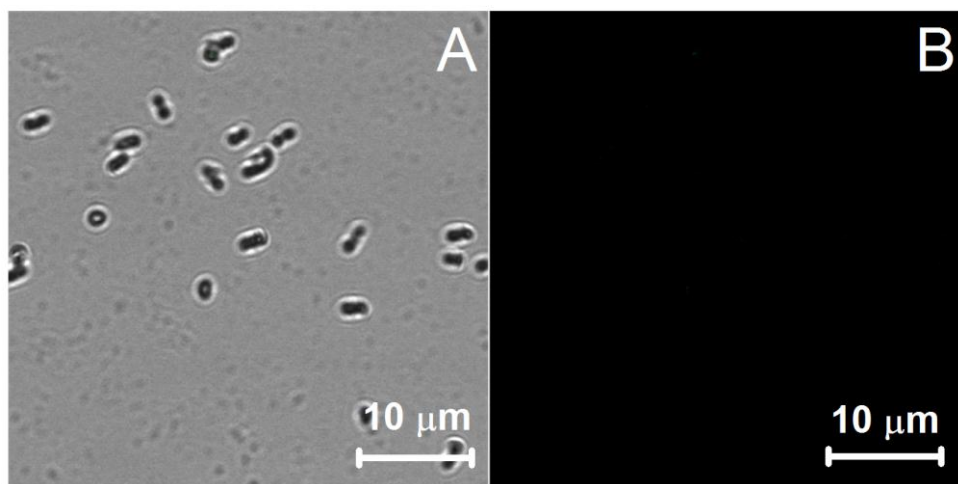

**Figure S6.** Laser scanning confocal microscopy images of *Bacillus thermophiles* after heating: (A) bright field, (B) excited wavelength at 435 nm.
